# Supplementary material
Source: PubMed Central journal article supplement (PMC7610174)
Supplement: NIHMS1634189-supplement-appendix.pdf [file NIHMS1634189-supplement-appendix.pdf]

## **1. APPENDIX**

### ***1.1. Service Classification***

This study included 131 specific services that are eligible for rewards incentives payments. We grouped these procedures into nine procedure categories—imaging procedures (CT scans, mammograms, MRIs, ultrasounds, and other imaging procedures) and invasive procedures (endoscopy, minor procedures, moderate procedures, and major procedures). The classification for each procedure is presented in Appendix Exhibit 1.

### ***1.2. Distribution of 75<sup>th</sup> and 25<sup>th</sup> Price Percentiles***

For each service grouping, we calculated the 75<sup>th</sup> and 25<sup>th</sup> price percentiles for each Metropolitan Statistical Area (MSA) in 2016. We used the combined intervention and comparison populations to calculate the price percentiles. Appendix Exhibit 2 presents the distribution of these ratios. The mean price ratios range from 1.77 for mammograms to 5.86 for non-classified imaging services. Across all procedures, the ratio is 3.48, which means that on average, the 75<sup>th</sup> percentile price is 2.48 times higher than the 25<sup>th</sup> percentile price for the same procedure in the same geographic market.

### ***1.3. Unadjusted Price Trend Calculation***

To calculate the unadjusted price trends, we calculated the monthly average price for each covered service in the intervention and comparison group. For both populations, we then weighted these average prices using the volume of services observed among the combined populations in 2016. Thus, the unadjusted price trends measure the change in service prices after holding utilization constant to 2016 levels.

#### **1.4. Regression-Adjusted Trends**

To measure regression-adjusted price trends, we estimated a difference-in-difference regression that included interaction terms between the intervention population indicator and each quarter. We used the fourth quarter of 2016, the quarter prior to implementation of the rewards program, as the reference group. This regression model thus provides the quarterly difference in prices between the intervention and comparison group. We assessed these price differences in the pre-implementation period to test for pre-implementation trends that may invalidate the necessary assumptions for our difference-in-differences model and in the post-implementation period to test for changes in the association with increasing exposure to the program.

We estimated the regression-adjusted price trend differences for each of the nine service groupings. For the secondary outcomes (choice of lower-priced provider and utilization), we pooled the services. We measured the use of rewards-eligible services at the year-level.

#### **1.5. Multivariate Difference-in-Difference Analysis**

To measure the impact of the rewards program on our three outcomes (price, choice of lower-priced provider, and utilization), we used a linear regression to estimate a difference-in-difference regression model of the following form:

$$y_{ijtk} = \alpha + \beta_1 post_t \times treatment_j + \beta_2 employer_j + \beta_3 time_t + \beta_4 X_{it} + \beta_5 CPT_k + \varepsilon_{ijtk} \quad (1)$$

In this equation,  $y_{ijtk}$  represents our outcomes of interest (i.e., service price, choice of lower-price provider, and utilization) for patient  $i$  who receives benefits from employer  $j$  in year  $t$ . The  $g$  and  $k$  terms index geographic market and service, respectively. The  $\beta_1$  coefficient on the  $post_t \times treatment_j$  interaction term of the post-rewards period (2017) and an indicator for the employers that have implemented the rewards program will provide our estimate of the effects of rewards. We do not include an independent

$post_t$  term because the model includes a time term for each year. Likewise, we do not include a main  $treatment_j$  term because we include employer fixed effects.

$X_{it}$  includes patient controls (age and gender). We also included fixed effects for each service's CPT code, which allows us to control for time-invariant differences in prices between services. We iteratively added fixed effects for Metropolitan Statistical Area (MSA). As sensitivity tests, we also included fixed effects that interact each CPT code and year to account for CPT code-specific time trends. As shown in Appendix Exhibit 3, adding additional controls does not meaningfully change the results. We were not able to include these interactions when using the annual utilization and spending dependent variables.

### **1.6. Changes in Provider Prices**

One potential concern with our analysis is the possibility that providers lower prices for the intervention population due to the implementation of the rewards program. If these provider price changes do not also apply to the comparison population, then the price changes we estimate may not reflect evidence of price shopping. As a test of this scenario, we estimated a similar model as equation (1), but included provider fixed effects. The provider fixed effects allow us to estimate a *within-provider* change in price between the intervention and comparison population following the implementation of the rewards program.

As shown in Appendix Exhibit 6, we do not find that provider prices changed differentially for the intervention and comparison population. Regardless of the inclusion of controls, the difference-in-difference coefficients are small in magnitude and are not statistically significant.

## Appendix Exhibit 1: Service Classification

| <u>Service</u>                                       | <u>Category</u> |
|------------------------------------------------------|-----------------|
| CT Abdomen & Pelvis w/ contrast                      | CT Scan         |
| CT Scan Head/Brain w/o contrast                      | CT Scan         |
| CT Abdomen & Pelvis w/o contrast                     | CT Scan         |
| CT Scan Chest w/ contrast                            | CT Scan         |
| CT Scan of Mouth, Jaw, and Neck w/o contrast         | CT Scan         |
| CT Scan Chest w/o contrast                           | CT Scan         |
| CT Angiography Chest                                 | CT Scan         |
| CT Abdomen & Pelvis w/o & w/ contrast                | CT Scan         |
| CT Soft Tissue Neck w Dye                            | CT Scan         |
| CT Scan of Lumbar Lower Spine w/o contrast           | CT Scan         |
| CT angiography neck w/ and w/o contrast              | CT Scan         |
| CT lower extremity w/o Contrast                      | CT Scan         |
| CT Scan Abdomen w/ contrast                          | CT Scan         |
| CT scan for needle biopsy                            | CT Scan         |
| CT Scan Abdomen w/o & w/ contrast                    | CT Scan         |
| CT Scan Chest w/o & w/ contrast                      | CT Scan         |
| CT Scan Head/Brain w/o & w/ contrast                 | CT Scan         |
| CT Scan of Lumbar Lower Spine w/ contrast            | CT Scan         |
| CT Scan Pelvis w/o contrast                          | CT Scan         |
| CT Scan Abdomen w/o contrast                         | CT Scan         |
| CT Angiography, Head w/o & w/ contrast               | CT Scan         |
| CT Scan of Mouth, Jaw, and Neck w/ contrast          | CT Scan         |
| CT Scan Pelvis w/contrast                            | CT Scan         |
| CT Angiography, Abdomen and Pelvis w/o & w/ contrast | CT Scan         |
| CT lower extremity w/ Contrast                       | CT Scan         |
| CT Scan Head/Brain w/ contrast                       | CT Scan         |
| CT Angiography, Abdomen w/o & w/ contrast            | CT Scan         |
| CT Scan Pelvis w/o & w/ contrast                     | CT Scan         |
| CT Scan of Mouth, Jaw, and Neck w/o & w/ contrast    | CT Scan         |
| CT Scan of Lumbar Lower Spine w/o & w/ contrast      | CT Scan         |
| CT lower extremity w/ & w/o Contrast                 | CT Scan         |
| Upper GI Endoscopy with Biopsy                       | Endoscopy       |
| Screening Colonoscopy                                | Endoscopy       |
| Colonoscopy with Biopsy                              | Endoscopy       |
| Colonoscopy with Removal of Lesion(s) or polyp(s)    | Endoscopy       |
| Upper GI Endoscopy                                   | Endoscopy       |
| Sigmoidoscopy                                        | Endoscopy       |
| MRI Lower Limb with Joint w/o contrast               | MRI             |
| MRI Lumbar Spine w/o contrast                        | MRI             |
| MRI Brain w/o & w/ contrast                          | MRI             |
| MRI Neck Spine w/o contrast                          | MRI             |
| MRI Brain w/o contrast                               | MRI             |
| MRI Upper Limb Joint w/o contrast                    | MRI             |
| MRI Abdomen w/o & w/ contrast                        | MRI             |
| MRI Lower Limb w/o contrast                          | MRI             |
| MR Angiography Head wo Dye                           | MRI             |
| MRI Lumbar Spine w/o & w/ contrast                   | MRI             |
| MRI Neck Spine w/o & w/ contrast                     | MRI             |
| MRI Spine w/o contrast                               | MRI             |
| MRI Pelvis w/o & w/ contrast                         | MRI             |
| MRI Both Breasts                                     | MRI             |
| MRI Spine w/o & w/ contrast                          | MRI             |
| MRI of Head (Orbit/Face/Neck) w/o & w/ contrast      | MRI             |
| MRI Upper Limb Joint w/ contrast                     | MRI             |
| MRI Abdomen w/o contrast                             | MRI             |

|                                                                             |                      |
|-----------------------------------------------------------------------------|----------------------|
| MRI Pelvis w/o contrast                                                     | MRI                  |
| MRI Lower Limb w/o & w/ contrast                                            | MRI                  |
| MRI Upper Limb (Other Than Joint) w/o contrast                              | MRI                  |
| MRI Lower Limb with Joint w/ contrast                                       | MRI                  |
| MRI Lower Limb with Joint w/o & w/ contrast                                 | MRI                  |
| MRI Upper Limb Joint w/o & w/ contrast                                      | MRI                  |
| MRI Brain w/ contrast                                                       | MRI                  |
| MRI Upper Limb (Other Than Joint) w/o contrast & w/contrast                 | MRI                  |
| MRI of Head (Orbit/Face/Neck) w/o contrast                                  | MRI                  |
| MRI Lumbar Spine w/ contrast                                                | MRI                  |
| MRI Neck Spine w/ contrast                                                  | MRI                  |
| MRI Pelvis w/ contrast                                                      | MRI                  |
| MRI One Breast                                                              | MRI                  |
| MRI Lower Limb w/ contrast                                                  | MRI                  |
| MRI Spine w/ contrast                                                       | MRI                  |
| MRI Abdomen w/ contrast                                                     | MRI                  |
| MRI of Head (Orbit/Face/Neck) w/ contrast                                   | MRI                  |
| Mammogram, Digital Screening of Two Breasts                                 | Mammogram            |
| Mammogram, Digital Diagnostic of One Breast                                 | Mammogram            |
| Mammogram, Digital Diagnostic of Two Breasts                                | Mammogram            |
| Bone Density study of Spine or Pelvis                                       | Other Imaging        |
| PET Scan Image w/ CT from Skull base to Mid-Thigh                           | Other Imaging        |
| Bone and Joint Scan of Whole Body                                           | Other Imaging        |
| PET Scan Image w/ CT of Whole Body                                          | Other Imaging        |
| Hip Replacement                                                             | Procedure - Major    |
| Bariatric Surgery - Laparoscopic                                            | Procedure - Major    |
| Hysterectomy                                                                | Procedure - Major    |
| Spinal Fusion (Posterior)                                                   | Procedure - Major    |
| Cardiac Angioplasty - w/ Drug Eluting Stent                                 | Procedure - Major    |
| Spinal Fusion (Anterior)                                                    | Procedure - Major    |
| Knee Replacement – Partial                                                  | Procedure - Major    |
| Laminectomy - Inpatient                                                     | Procedure - Major    |
| Bariatric Surgery (Lap Band)                                                | Procedure - Major    |
| Revision of Total Hip or Total Knee Replacement                             | Procedure - Major    |
| Partial or Total Removal of Thyroid Gland                                   | Procedure - Major    |
| Urethra and Bladder Scope                                                   | Procedure - Minor    |
| Breast Biopsy w/Imaging                                                     | Procedure - Minor    |
| Tympanostomy and Myringotomy                                                | Procedure - Minor    |
| Bladder Scope with Stent                                                    | Procedure - Minor    |
| Bronchoscopy                                                                | Procedure - Minor    |
| Bladder Scope with Lithotripsy (Kidney Stone fragmentation)                 | Procedure - Minor    |
| Cataract Removal                                                            | Procedure - Moderate |
| Knee Arthroscopy with Cartilage Repair                                      | Procedure - Moderate |
| Laparoscopic Gall Bladder Removal                                           | Procedure - Moderate |
| Nasal/Sinus - Endoscopy - Sinus Surgery                                     | Procedure - Moderate |
| Hysteroscopy Uterine Tissue Sample (with Biopsy, with or without D&C)       | Procedure - Moderate |
| Tonsillectomy and/or Adenoidectomy, Under Age 12                            | Procedure - Moderate |
| Nasal/Sinus - Corrective Surgery - Septoplasty                              | Procedure - Moderate |
| Nasal/Sinus - Submucous Resection Inferior Turbinate                        | Procedure - Moderate |
| Shoulder Arthroscopy                                                        | Procedure - Moderate |
| Tonsillectomy and Adenoidectomy, Over Age 12                                | Procedure - Moderate |
| Hysteroscopy with Removal of Lesion(s) or Uterine Lining (e.g. Endometrial) | Procedure - Moderate |
| Carpal Tunnel                                                               | Procedure - Moderate |
| Lithotripsy - Fragmenting of Kidney Stones                                  | Procedure - Moderate |
| Laparoscopic Removal of Ovaries and/or Fallopian Tubes                      | Procedure - Moderate |
| Shoulder Arthroscopy with Rotator Cuff Repair                               | Procedure - Moderate |
| Bunionectomy                                                                | Procedure - Moderate |

|                                                   |                      |
|---------------------------------------------------|----------------------|
| Hammertoe Correction                              | Procedure - Moderate |
| Breast Lumpectomy                                 | Procedure - Moderate |
| Hernia Inguinal Repair (Age 5+, Non-Laparoscopic) | Procedure - Moderate |
| Repair of Umbilical Hernia (Age 5+)               | Procedure - Moderate |
| Repair of Laparoscopic Inguinal Hernia            | Procedure - Moderate |
| Bladder Repair For Incontinence (Sling)           | Procedure - Moderate |
| Carpal Tunnel with Scope                          | Procedure - Moderate |
| Tympanoplasty (ear drum repair)                   | Procedure - Moderate |
| Total Thyroid Removal                             | Procedure - Moderate |
| Laparoscopic Tubal Block or Tubal Ligation        | Procedure - Moderate |
| Rotator Cuff Repair (Surgical, Non-Arthroscopic)  | Procedure - Moderate |
| Hysteroscopy and Sterilization (Tubal Ligation)   | Procedure - Moderate |
| Ultrasound of Breast(s)                           | Ultrasound           |
| Ultrasound of Abdomen                             | Ultrasound           |
| Ultrasound Exam of Abdomen                        | Ultrasound           |
| Ultrasound Exam Scrotum                           | Ultrasound           |
| Ultrasound of Abdomen & Back                      | Ultrasound           |
| Ultrasound of Head and Neck                       | Ultrasound           |
| Ultrasound of Pelvis                              | Ultrasound           |

---

## Appendix Exhibit 2: Distribution of Within-Market 75<sup>th</sup> and 25<sup>th</sup> Price Percentile Ratios

### (a) CT Scan

Distribution of Within-MSA 75th and 25th Price Percentiles  
CT Scan

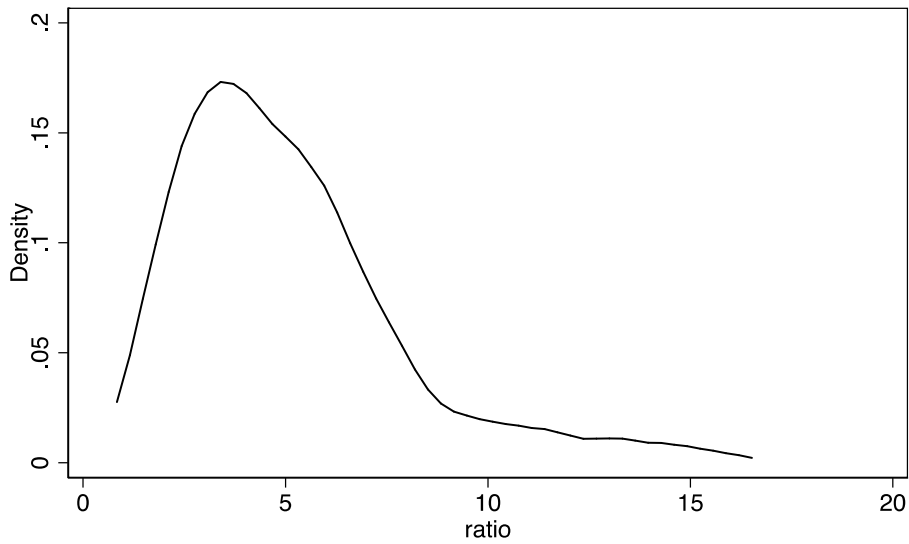

Average 75th/25th price percentile ratio is 5.11

### (b) Mammogram

Distribution of Within-MSA 75th and 25th Price Percentiles  
Mammogram

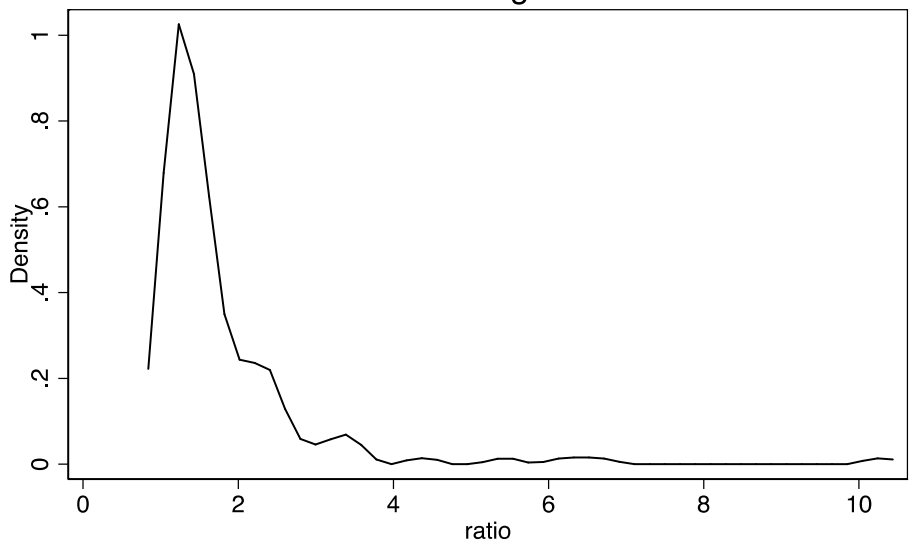

Average 75th/25th price percentile ratio is 1.77

(c) MRI

Distribution of Within-MSA 75th and 25th Price Percentiles  
MRI

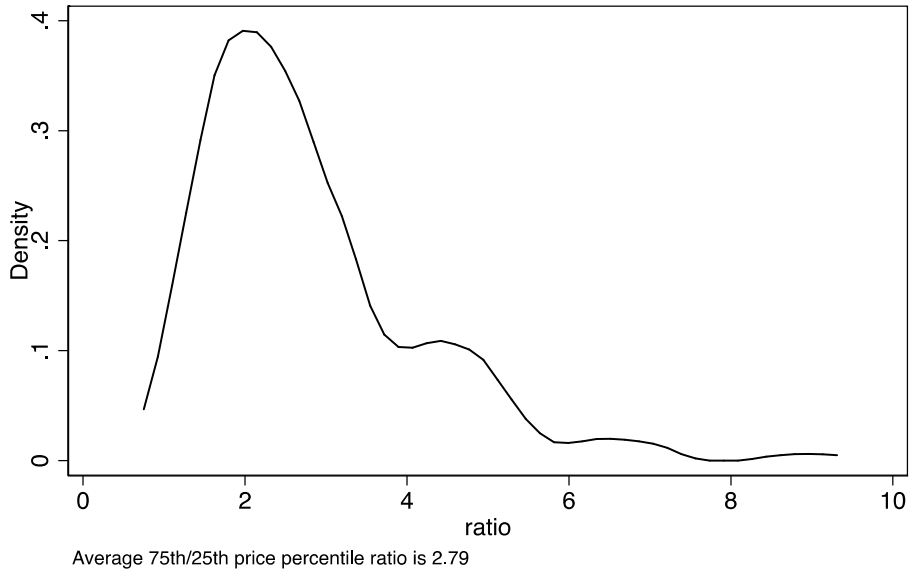

(d) Ultrasound

Distribution of Within-MSA 75th and 25th Price Percentiles  
Ultrasound

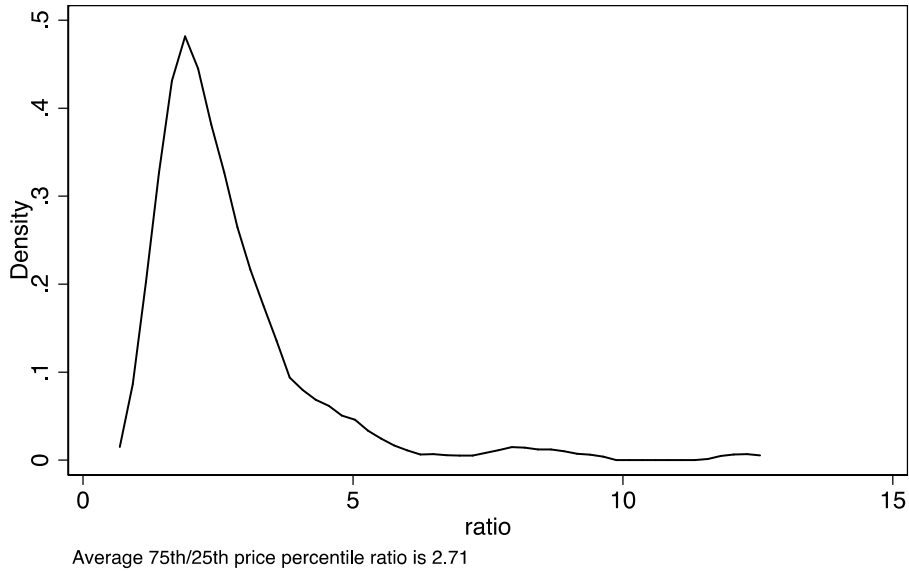



(e) Other Imaging

Distribution of Within-MSA 75th and 25th Price Percentiles  
Other Imaging

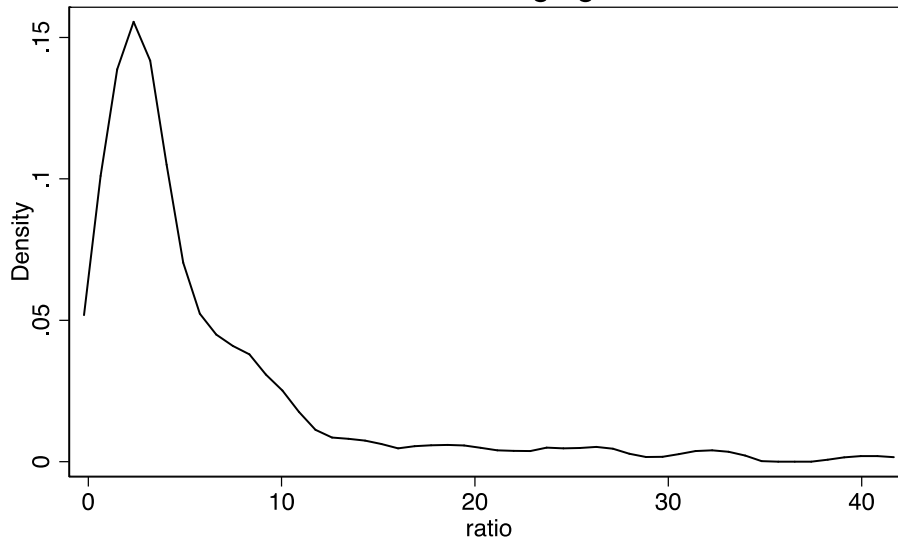

Average 75th/25th price percentile ratio is 5.88

(f) Endoscopy

Distribution of Within-MSA 75th and 25th Price Percentiles  
Endoscopy

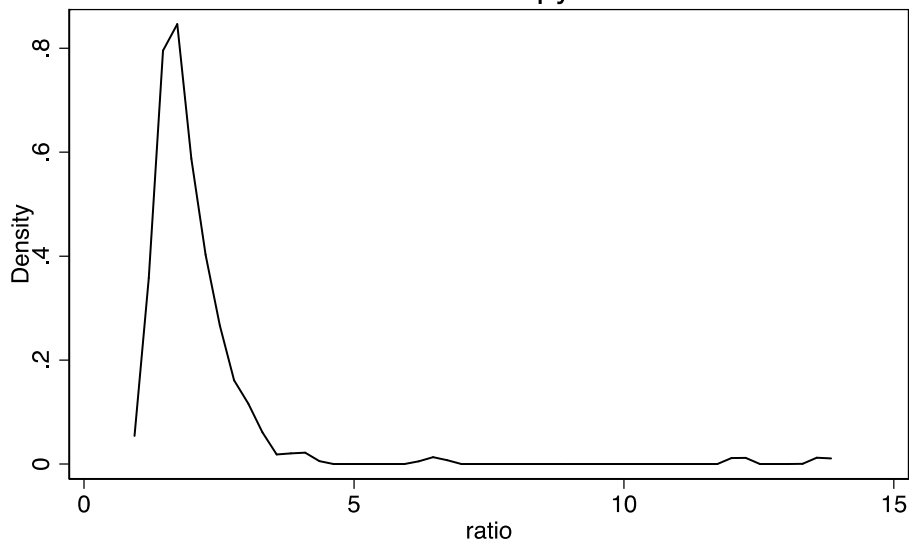

Average 75th/25th price percentile ratio is 2.08

(g) Minor Procedures

Distribution of Within-MSA 75th and 25th Price Percentiles  
Minor Procedure

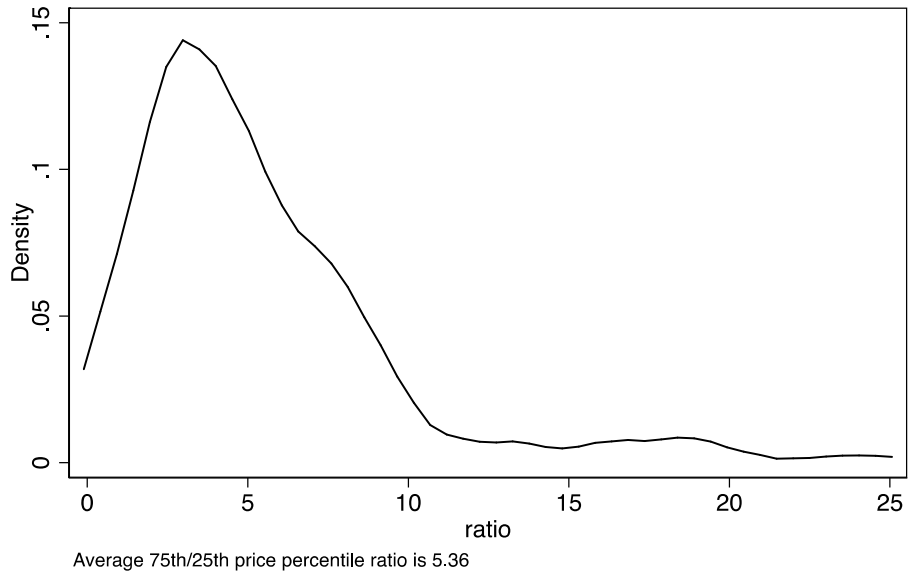

(h) Moderate Procedures

Distribution of Within-MSA 75th and 25th Price Percentiles  
Moderate Procedure

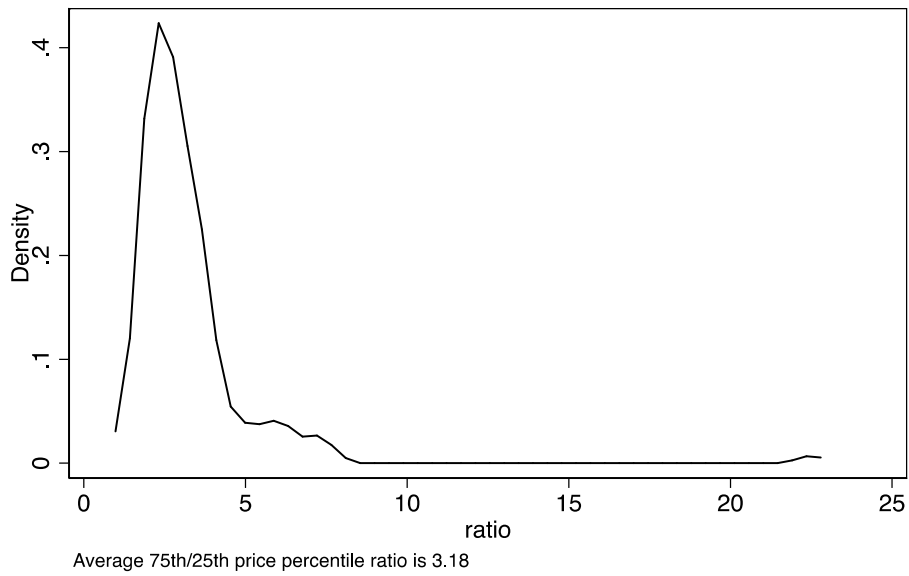

(i) Major Procedures

Distribution of Within-MSA 75th and 25th Price Percentiles  
Major Procedure

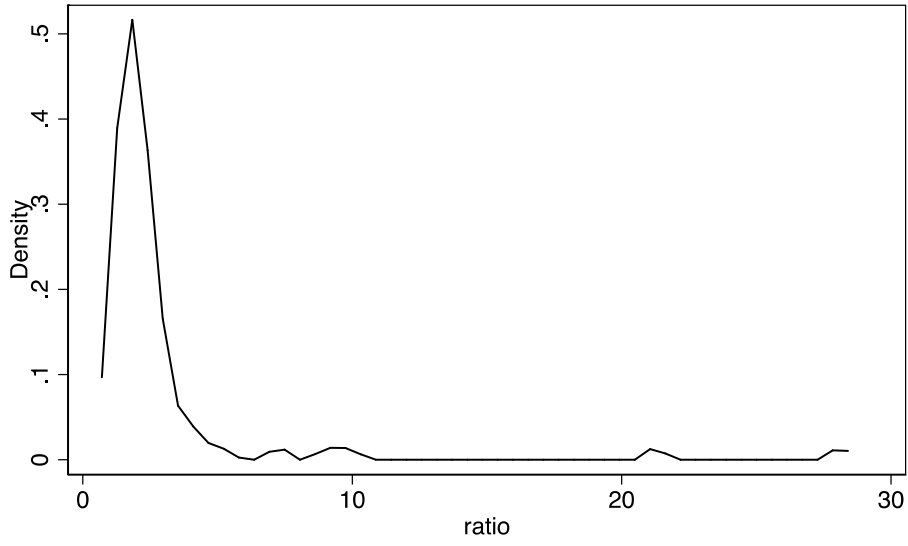

### Appendix Exhibit 3: Regression Sensitivity Test

|                                                                            | (1)                         | (2)                 | (3)                 | (4)                  | (5)                 | (6)                  |
|----------------------------------------------------------------------------|-----------------------------|---------------------|---------------------|----------------------|---------------------|----------------------|
| <i>Panel A: Log-transformed service price</i>                              |                             |                     |                     |                      |                     |                      |
| post X rewards                                                             | -0.026**<br>(0.007)         | -0.022**<br>(0.007) | -0.021**<br>(0.005) | -0.023**<br>(0.005)  | -0.020**<br>(0.005) | -0.024**<br>(0.006)  |
| R-squared                                                                  | 0.053                       | 0.062               | 0.632               | 0.774                | 0.662               | 0.731                |
| Observations                                                               | 524,197                     | 524,197             | 524,197             | 524,197              | 524,197             | 524,197              |
| <i>Panel B: Probability of choosing lower-priced provider</i>              |                             |                     |                     |                      |                     |                      |
| post X rewards                                                             | 0.014**<br>(0.003)          | 0.014**<br>(0.003)  | 0.013**<br>(0.003)  | 0.012**<br>(0.003)   | 0.013**<br>(0.003)  | 0.012***<br>(0.0034) |
| R-squared                                                                  | 0.001                       | 0.01                | 0.17                | 0.45                 | 0.36                |                      |
| Observations                                                               | 524,197                     | 524,197             | 524,197             | 524,197              | 524,197             | 524,197              |
| <i>Panel C: Probability of having any rewards-eligible service in year</i> |                             |                     |                     |                      |                     |                      |
| post X rewards                                                             | -0.002<br>(0.001)           | -0.003*<br>(0.001)  | -0.003*<br>(0.001)  | -0.006***<br>(0.001) | N.E.                | N.E.                 |
| R-squared                                                                  | 0.10                        | 0.11                | 0.11                | 0.17                 |                     |                      |
| Observations                                                               | 1,668,969                   | 1,668,969           | 1,668,969           | 1,668,969            |                     |                      |
| <i>Panel D: Log-transformed Annual Medical Spending</i>                    |                             |                     |                     |                      |                     |                      |
| post X rewards                                                             | -0.042*<br>(0.020)          | -0.053**<br>(0.020) | -0.053**<br>(0.020) | -0.104**<br>(0.020)  | N.E.                | N.E.                 |
| R-squared                                                                  | 0.10                        | 0.11                | 0.11                | 0.17                 |                     |                      |
| Observations                                                               | 1,668,969                   | 1,668,969           | 1,668,969           | 1,668,969            |                     |                      |
| Regression Controls                                                        | demographics, year/month FE | +Plan FE            | +CPT FE             | +MSA FE              | +Year X CPT FE      | +Year X MSA FE       |

Note: \*  $p < 0.05$ , \*\*  $p < 0.001$ . This table presents multivariate difference-in-difference regressions that iteratively add covariates. The results in column 1 include controls for patient demographic (age and gender), year fixed effects (FE), and month fixed effects. Column 2 adds plan fixed effects, column 3 adds CPT code fixed effects, column 4 adds Metropolitan Statistical Area (MSA) fixed effects. To control for CPT code- and state-specific time trends, columns 5 and 6 interact the year fixed effects with the CPT code and MSA fixed effects, respectively. Models using these interactions are non-estimable (N.E.) when using annual utilization and spending as the dependent variable, as we only have one observation per person-year. Panel A uses the log-transformed price as the dependent variable. These results can be interpreted in percentage terms by applying  $\exp(\text{post X rewards}) - 1 \times 100$ . Panel B uses the probability of receiving care from a lower-priced provider as the dependent variable, and Panel C estimates the probability of receiving at least one of the rewards-eligible services in each calendar year. Standard errors in parentheses.

**Appendix Exhibit 4: Estimated Impact of Reward Program on Relative Percent Change in Average Prices (95% CI)**

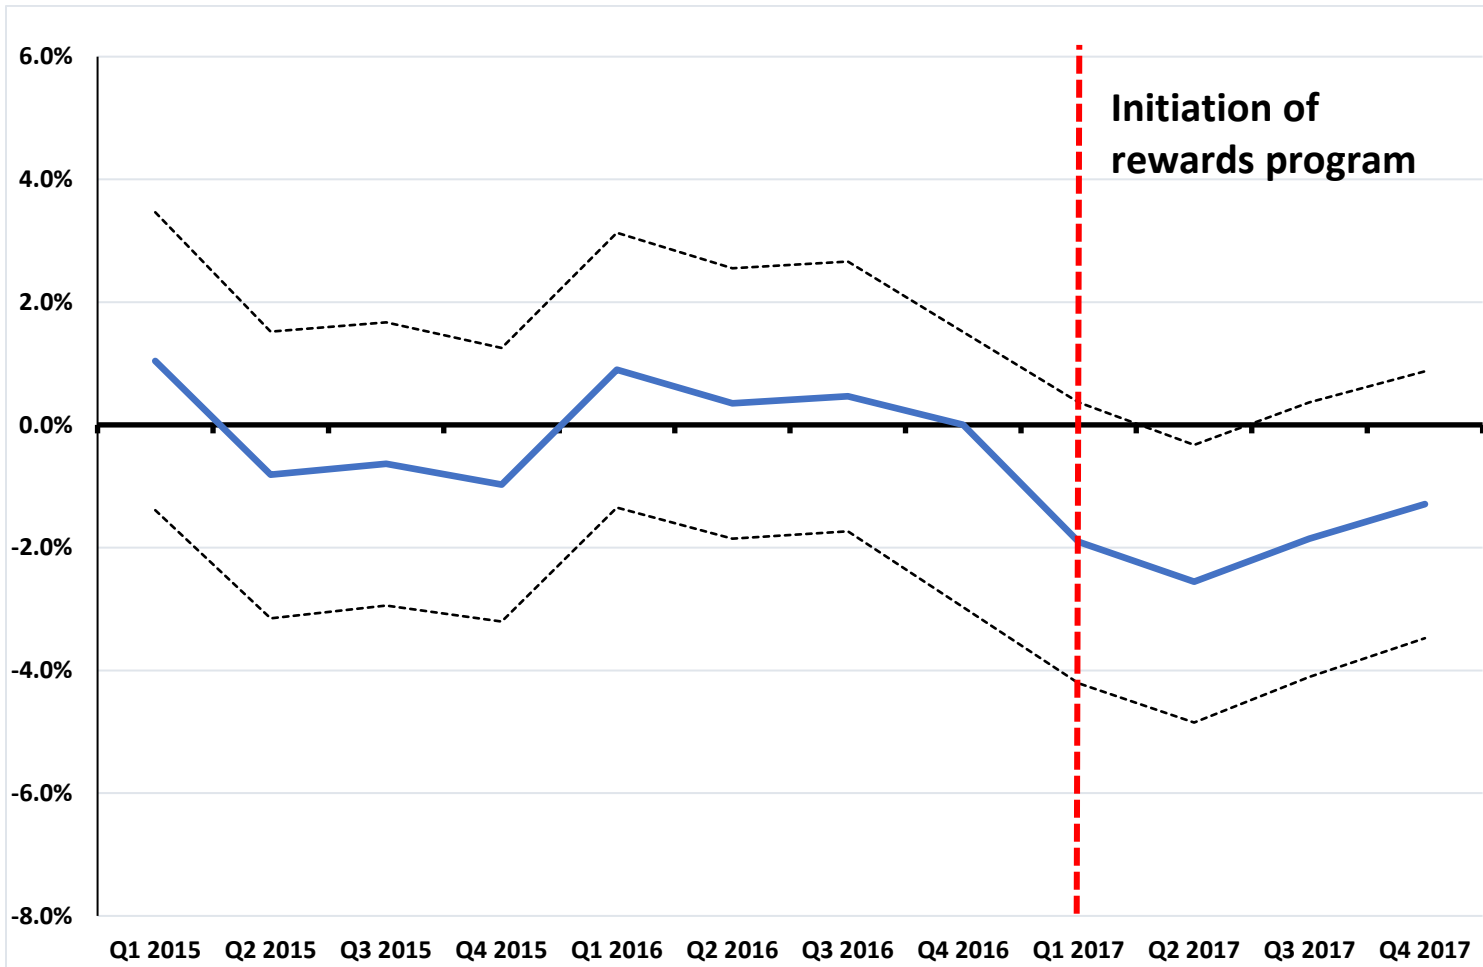

This figure shows the regression-adjusted differences in prices for all services between the intervention and comparison population during each quarter. The reference period is the last quarter of 2016. The vertical red line indicates the January 2017 implementation of the rewards program for the intervention population. The dashed horizontal lines indicate 95% confidence intervals.

**Appendix Exhibit 5: Regression-Adjusted Quarterly Price Differences for Procedure-Specific Prices, Choice of Lower-Priced Provider, and Utilization Outcomes**

(a) CT Scan

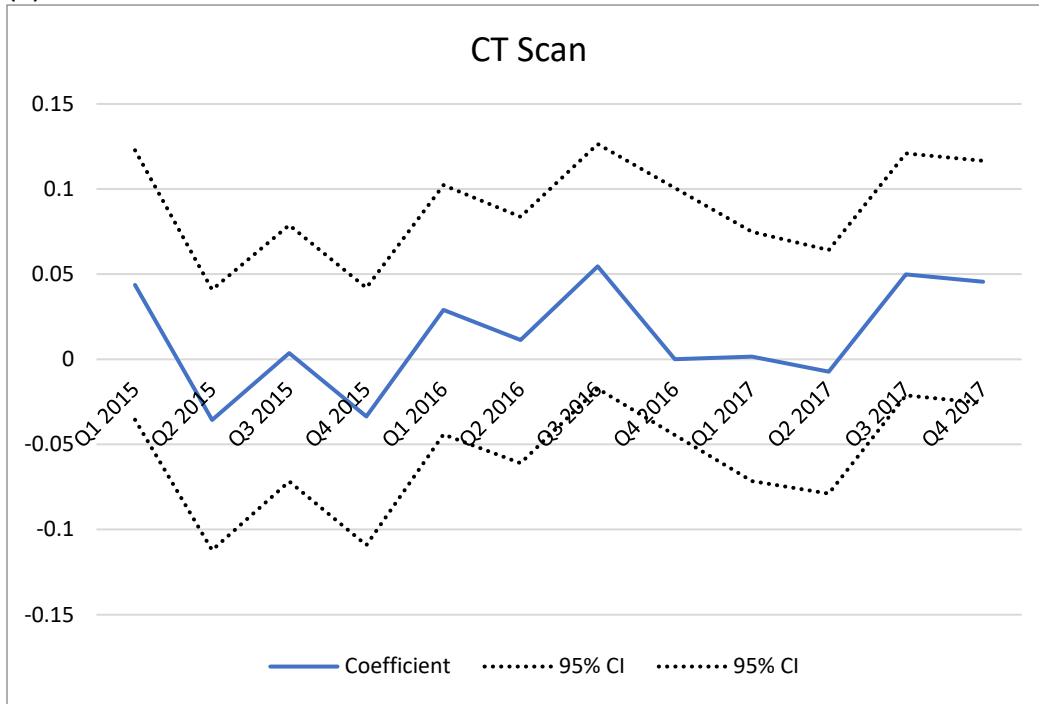

(b) Mammogram

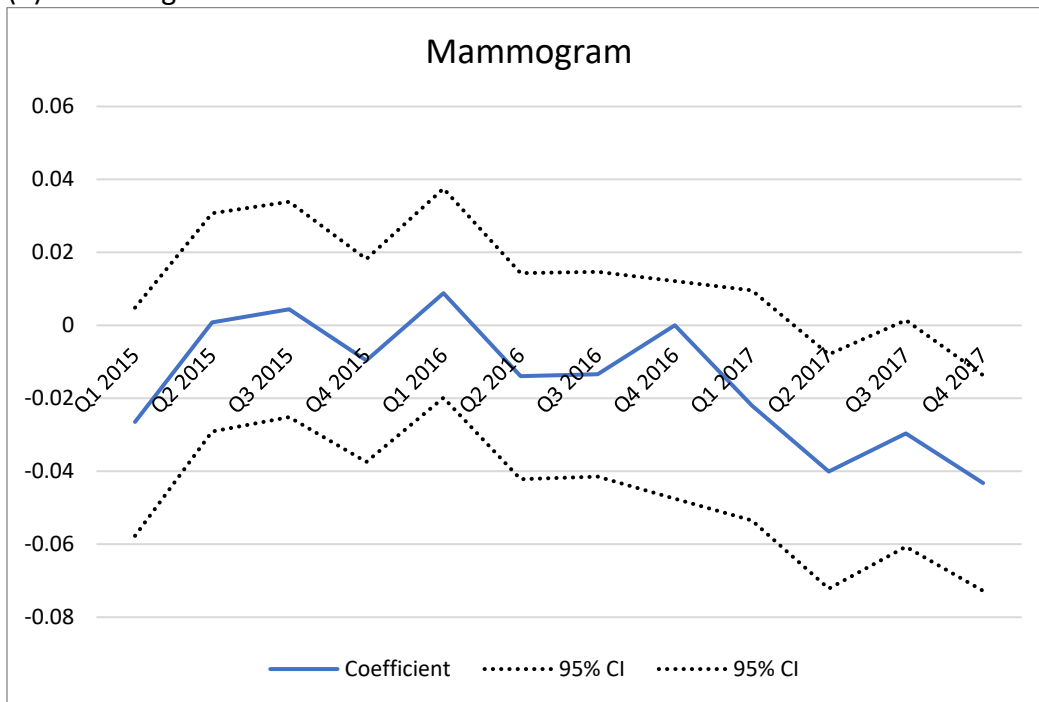

(c) MRI

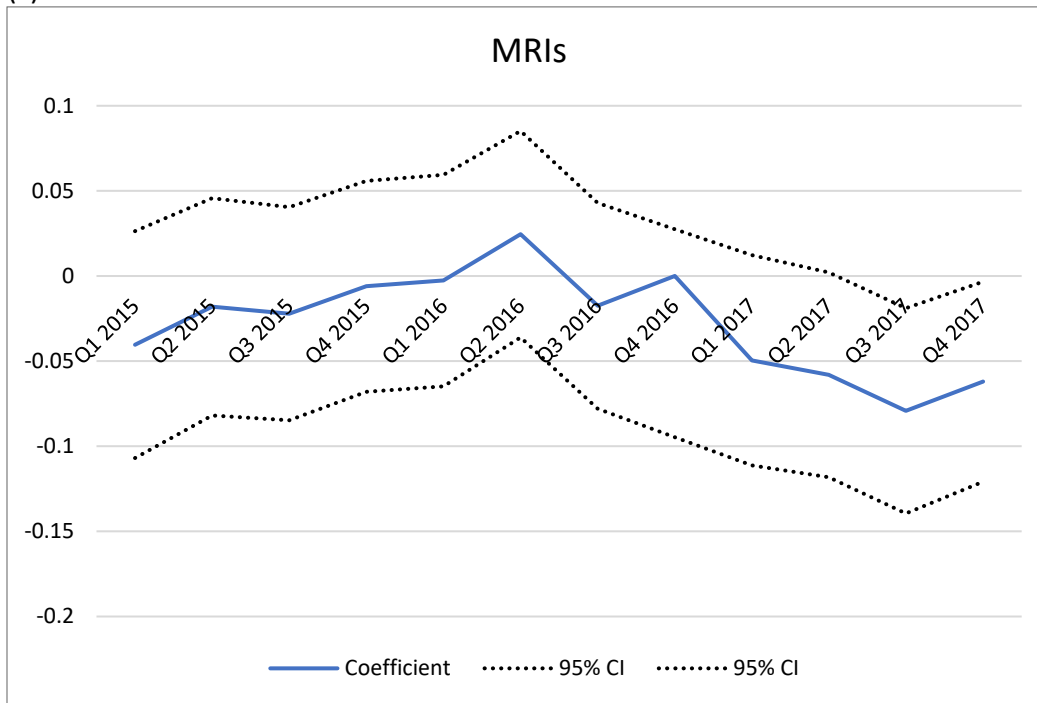

(d) Ultrasound

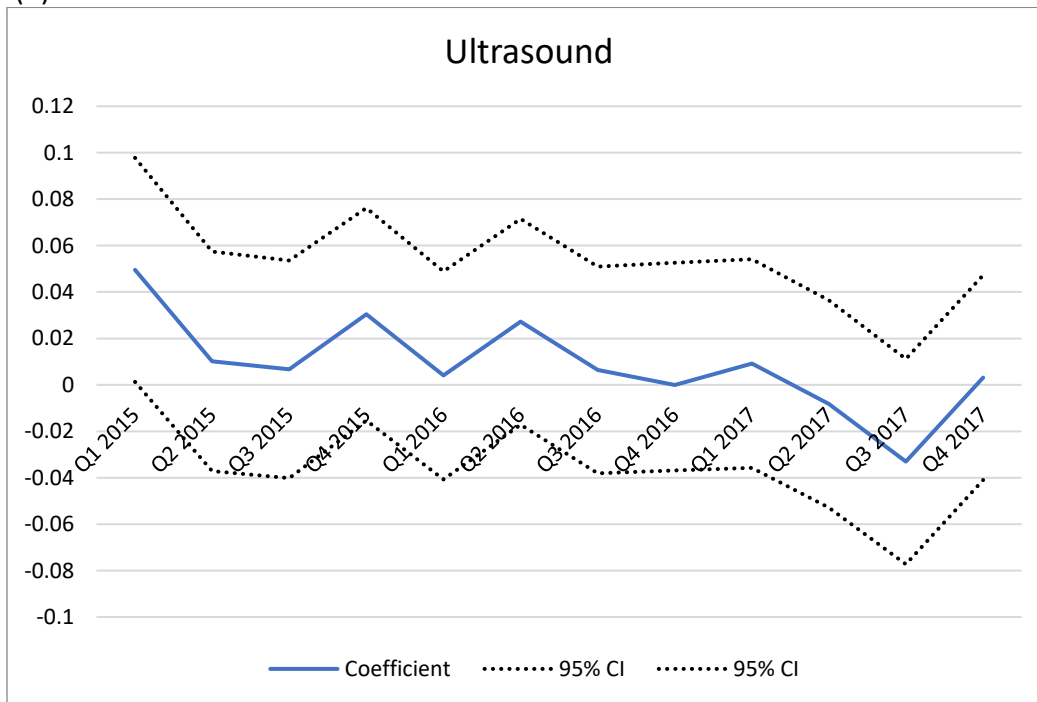

(e) Other Imaging

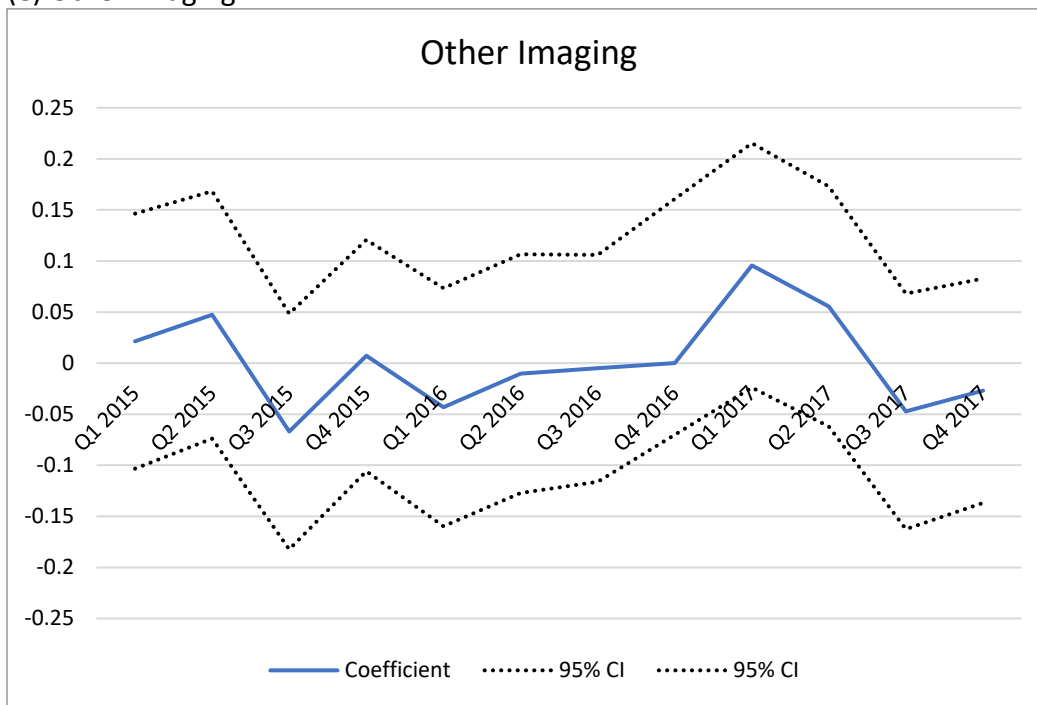

(f) Endoscopy

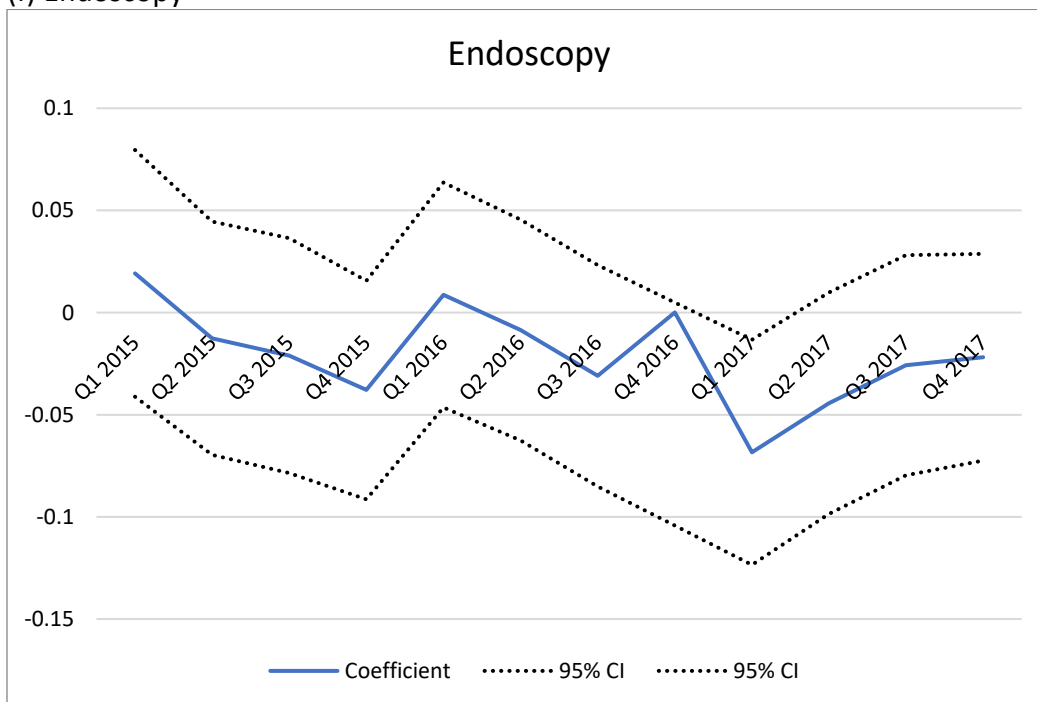



(g) Minor Procedures

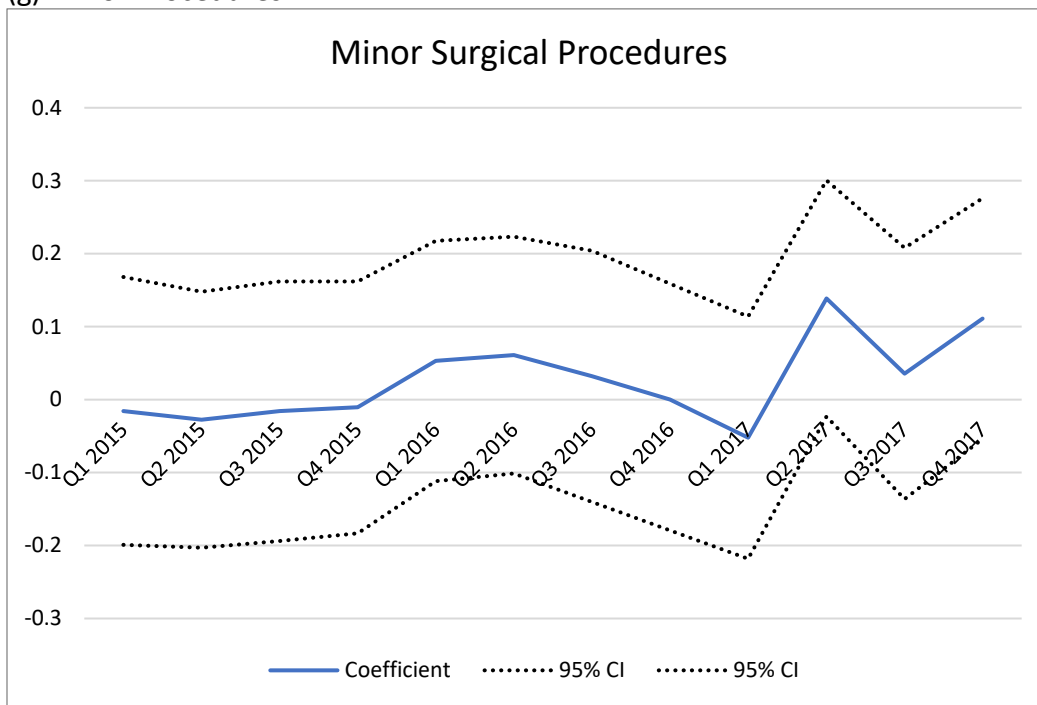

(h) Moderate Procedures

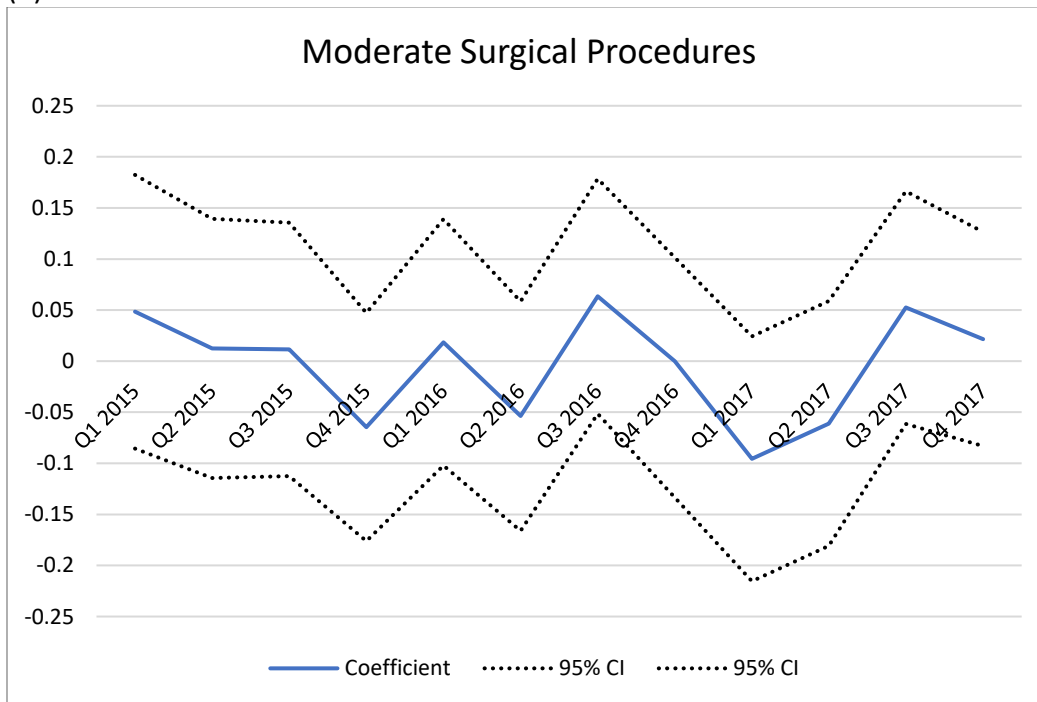

(i) Major Procedures

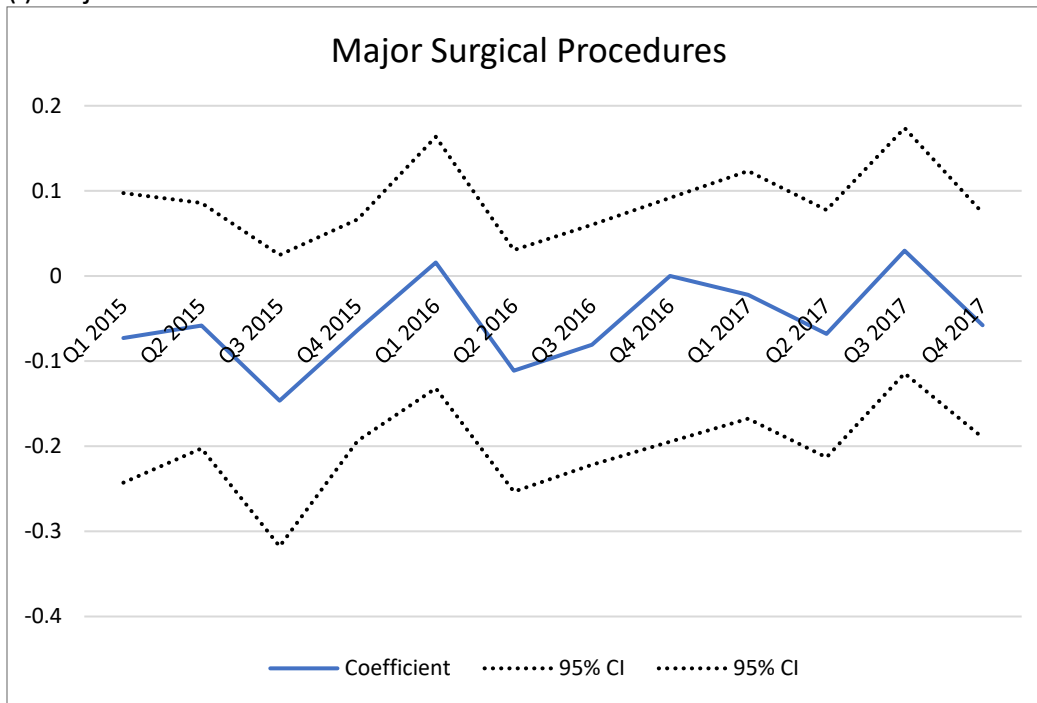

(j) Choice of Lower-Priced Providers

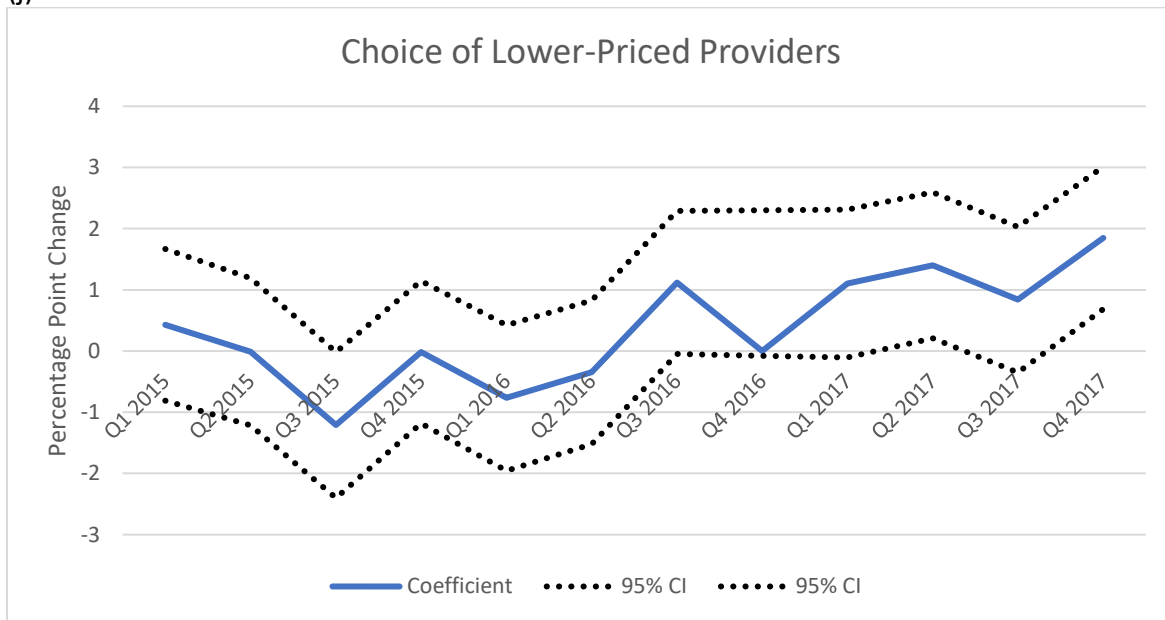

(k) Use of Rewards-Eligible Services

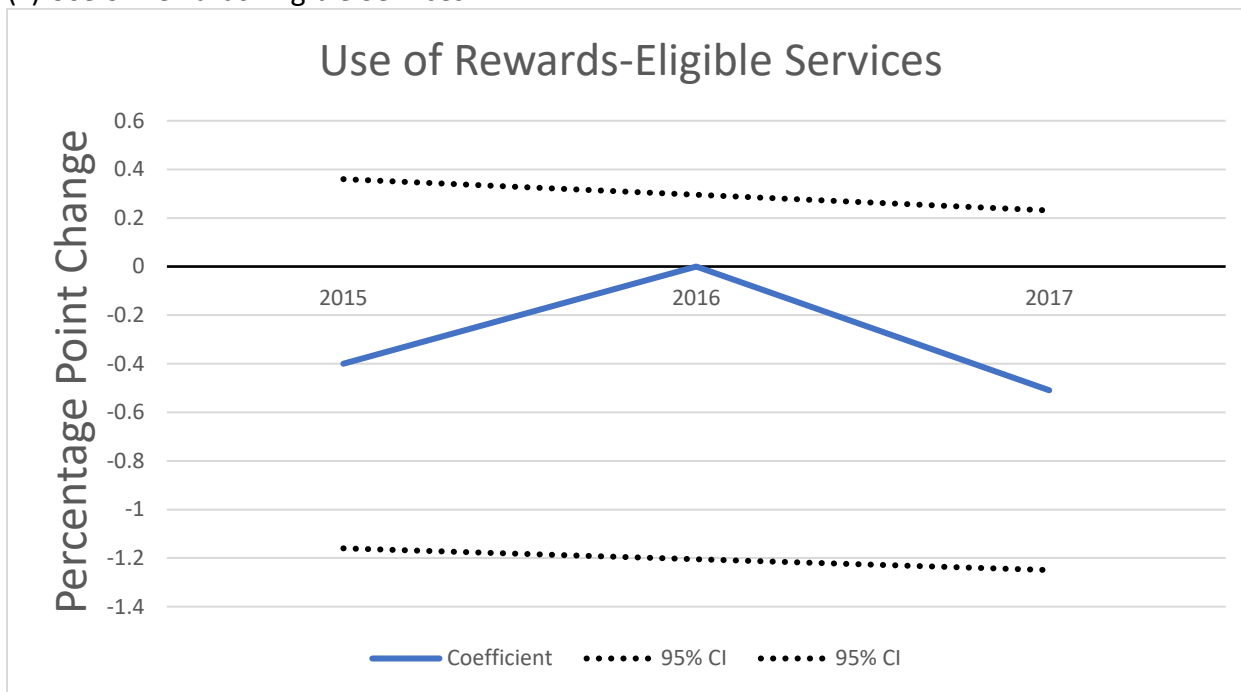

## Appendix Exhibit 6: Test for Changes in Provider Prices

|                     | (1)                            | (2)                      | (3)                     | (4)                     | (5)                      | (6)                      |
|---------------------|--------------------------------|--------------------------|-------------------------|-------------------------|--------------------------|--------------------------|
| post X rewards      | -0.6%<br>(-1.7% to 0.5%)       | -0.3%<br>(-1.6% to 1.1%) | 0.1%<br>(-0.5% to 0.7%) | 0.3%<br>(-0.3% to 0.9%) | -0.1%<br>(-0.7% to 0.5%) | -0.1%<br>(-0.7% to 0.5%) |
| R-squared           | 0.053                          | 0.062                    | 0.632                   | 0.774                   | 0.662                    | 0.368                    |
| Observations        | 524,197                        | 524,197                  | 524,197                 | 524,197                 | 524,197                  | 524,197                  |
| Provider FE         | X                              | X                        | X                       | X                       | X                        | X                        |
| Regression Controls | demographics,<br>year/month FE | +Plan FE                 | +CPT FE                 | +MSA FE                 | +Year X CPT FE           | +Year X MSA FE           |

Note: \*  $p < 0.05$ , \*\*  $p < 0.001$ . This table presents multivariate difference-in-difference regressions that include provider fixed effects to test for changes in provider prices between the intervention and comparison population. All columns include provider fixed effects. The results in column 1 include controls for patient demographic (age and gender), year fixed effects (FE), and month fixed effects. Column 2 adds plan fixed effects, column 3 adds CPT code fixed effects, column 4 adds Metropolitan Statistical Area (MSA) fixed effects. To control for CPT code- and state-specific time trends, columns 5 and 6 interact the year fixed effects with the CPT code and MSA fixed effects, respectively. The dependent variable is the log-transformed price, and results can be interpreted as percentage changes in prices. 95% confidence intervals in parentheses.

**Appendix Exhibit 7: Savings Calculation**

|                                                                                |                                                  |
|--------------------------------------------------------------------------------|--------------------------------------------------|
| Total 2017 spending on rewards-eligible services among intervention population | \$108,721,375                                    |
| Average reduction in spending attributable to rewards program                  | 2.1%                                             |
| Implied spending on rewards-eligible services in the absence of rewards        | $\$108,721,375 / (1-2.1\%)$<br>= \$111,053,498   |
| Implied difference in spending due to rewards program                          | $\$111,053,498 - \$108,721,375$<br>= \$2,283,149 |
| Spending on rewards incentives                                                 | \$204,700                                        |
| Net savings attributable to rewards                                            | $\$2,283,149 - \$204,700$<br>= \$2,127,422       |
| Number of individuals eligible for rewards program                             | 269,875                                          |
| Per-person savings                                                             | $\$2,127,422 / 269,875$<br>= \$7.88              |
